# Supplementary material for: The Effects of 12 Weeks Colostrum Milk Supplementation on the Expression Levels of Pro-Inflammatory Mediators and Metabolic Changes among Older Adults: Findings from the Biomarkers and Untargeted Metabolomic Analysis
Source: MDPI journal article supplement (doi:10.3390/nu15143184), 2023-07-18
Supplement: s1 [file s1]

## Supplementary materials

**Table S1.** Nutritional information of IgCo bovine colostrum-enriched skim milk and placebo (regular skim milk)

| Nutrition                      | IgCo bovine colostrum-enriched skim milk<br>(per 100g) | Placebo<br>(per 100g) |
|--------------------------------|--------------------------------------------------------|-----------------------|
| Energy (kcal)                  | 357                                                    | 360                   |
| Energy/calorie from fat (kcal) | 8                                                      | 10                    |
| Fat (g)                        | 0.92                                                   | 1.11                  |
| Carbohydrate (g)               | 50.4                                                   | 54.1                  |
| Total sugars (g)               | 38.3                                                   | 35.6                  |
| Protein (g)                    | 36.7                                                   | 33.5                  |
| Zinc (mg)                      | 2.94                                                   | 3.26                  |
| Magnesium (mg)                 | NA                                                     | 122                   |
| Iron (mg)                      | ND (<0.10)                                             | 0.18                  |
| Copper (mg)                    | ND (<0.10)                                             | NA                    |
| Calcium (mg)                   | 5752                                                   | 1247                  |
| Vitamin A 0.241(μg)            | ND (<45)                                               | ND (<45)              |
| Vitamin C (mg)                 | 310                                                    | ND (<0.10)            |
| Vitamin D3 (μg)                | ND (<2)                                                | 2.55                  |
| Vitamin E (IU)                 | 0.03                                                   | 0.03                  |
| Vitamin B1 (mg)                | 0.241                                                  | 0.265                 |
| Vitamin B2 (mg)                | 1.08                                                   | 4.18                  |
| Vitamin B3 (mg)                | 0.92                                                   | NA                    |
| Vitamin B5 (mg)                | 4.11                                                   | NA                    |
| Vitamin B6 (mg)                | 0.053                                                  | ND (<0.005)           |
| Biotin (μg)                    | 18.1                                                   | NA                    |
| Folic acid (μg)                | 2.22                                                   | 6.08                  |
| Vitamin B12 (μg)               | 0.83                                                   | NA                    |
| Vitamin K1 (μg)                | 9.7                                                    | NA                    |

Note: NA, data not available; ND, not detected.

**Table S2.** Relative quantification of the major serum metabolites within the IgCo supplemented group pre- and post-intervention.

| Metabolite                                      | Fold Change | State | pvalue | VIP   |
|-------------------------------------------------|-------------|-------|--------|-------|
| N-Acetylserotonin                               | 0.057       | Down  | 0.000  | 5.698 |
| 8-Hydroxyalanylclavam                           | 4.725       | Up    | 0.000  | 3.836 |
| Merodesmosine                                   | 2.439       | Up    | 0.002  | 3.628 |
| 3,3',4'5-Tetrahydroxystilbene                   | 0.170       | Down  | 0.000  | 3.487 |
| 9,12,13-TriHOME                                 | 0.256       | Down  | 0.000  | 3.352 |
| 6-Keto-prostaglandin F1a                        | 0.317       | Down  | 0.000  | 3.265 |
| 15-Keto-prostaglandin F2a                       | 0.338       | Down  | 0.000  | 3.264 |
| 3,4-Dihydroxymandelic acid                      | 0.270       | Down  | 0.000  | 3.006 |
| (13E)-11a-Hydroxy-9,15-dioxoprost-13-enoic acid | 0.386       | Down  | 0.000  | 2.828 |
| L-Methionine                                    | 0.441       | Down  | 0.006  | 2.661 |
| Linoleamide                                     | 2.213       | Up    | 0.000  | 2.621 |
| Oleamide                                        | 1.908       | Up    | 0.000  | 2.356 |
| 2,4,12-Octadecatrienoic acid isobutylamide      | 2.133       | Up    | 0.001  | 2.263 |
| PE(P-16:0e/0:0)                                 | 1.777       | Up    | 0.001  | 2.191 |
| Dolichol phosphate                              | 3.285       | Up    | 0.043  | 2.190 |
| Deoxycholic acid glycine conjugate              | 0.512       | Down  | 0.020  | 2.054 |
| N-Oleoylethanolamine                            | 1.878       | Up    | 0.014  | 2.028 |
| 4,4'-Diapolycopenedial                          | 1.810       | Up    | 0.003  | 2.004 |
| Monoethylhexyl phthalic acid                    | 2.164       | Up    | 0.031  | 1.843 |
| PE(P-16:0/18:1(9Z))                             | 0.421       | Down  | 0.015  | 1.779 |
| PE(P-18:0/18:2(9Z,12Z))                         | 0.474       | Down  | 0.017  | 1.739 |
| N-arachidonoyl dopamine                         | 1.724       | Up    | 0.008  | 1.703 |
| Gamma-Linolenic acid                            | 1.641       | Up    | 0.010  | 1.628 |
| Leukotriene E3                                  | 1.680       | Up    | 0.001  | 1.606 |
| 20-Hydroxyeicosatetraenoic acid                 | 1.550       | Up    | 0.015  | 1.584 |
| SM(d18:0/16:0)                                  | 0.440       | Down  | 0.016  | 1.567 |
| Propionylcarnitine                              | 0.673       | Down  | 0.014  | 1.544 |
| N,N-Dimethylsphingosine                         | 1.597       | Up    | 0.018  | 1.535 |
| 3-Hydroxyisovaleric acid                        | 0.729       | Down  | 0.034  | 1.511 |
| Hippuric acid                                   | 0.594       | Down  | 0.023  | 1.477 |
| Sphingosine                                     | 1.658       | Up    | 0.008  | 1.453 |
| SM(d18:1/18:0)                                  | 0.550       | Down  | 0.011  | 1.444 |
| L-Arginine                                      | 0.668       | Down  | 0.015  | 1.409 |
| 4-Hydroxyphenylpyruvic acid                     | 0.687       | Down  | 0.005  | 1.403 |
| L-Acetylcarnitine                               | 0.656       | Down  | 0.008  | 1.389 |
| PE(20:0/20:2(11Z,14Z))                          | 0.614       | Down  | 0.027  | 1.334 |
| PE(18:0/22:5(4Z,7Z,10Z,13Z,16Z))                | 0.723       | Down  | 0.020  | 1.309 |
| PS(18:0/18:1(9Z))                               | 2.180       | Up    | 0.027  | 1.241 |
| Iodine                                          | 0.755       | Down  | 0.026  | 1.234 |
| Glycerophosphocholine                           | 1.396       | Up    | 0.017  | 1.231 |
| 2-Methylcitric acid                             | 0.772       | Down  | 0.008  | 1.210 |
| Octadecanamide                                  | 1.406       | Up    | 0.001  | 1.206 |
| PE(P-16:0/18:2(9Z,12Z))                         | 0.626       | Down  | 0.038  | 1.206 |
| Sphinganine 1-phosphate                         | 1.300       | Up    | 0.049  | 1.202 |

|                       |       |      |       |       |
|-----------------------|-------|------|-------|-------|
| PE(16:0/22:1(13Z))    | 0.693 | Down | 0.027 | 1.163 |
| Methyl stearate       | 1.467 | Up   | 0.024 | 1.091 |
| Phosphonoacetaldehyde | 0.781 | Down | 0.040 | 1.090 |
| Cholesterol sulfate   | 0.693 | Down | 0.005 | 1.005 |

---

**Table S3.** Relative quantification of the major serum metabolites within the placebo group pre- and post-intervention.

| Metabolite                                             | Fold Change | State | pvalue | VIP   |
|--------------------------------------------------------|-------------|-------|--------|-------|
| N-Acetylserotonin                                      | 0.160       | Down  | 0.000  | 5.278 |
| 9,12,13-TriHOME                                        | 0.215       | Down  | 0.000  | 4.516 |
| 8-Hydroxyalanylcavam                                   | 4.365       | Up    | 0.000  | 4.447 |
| 3,3',4'5-Tetrahydroxystilbene                          | 0.198       | Down  | 0.000  | 3.770 |
| UDP-L-Ara4O                                            | 0.298       | Down  | 0.029  | 3.491 |
| 5'-(3',4'-Dihydroxyphenyl)-gamma-valerolactone sulfate | 0.310       | Down  | 0.005  | 3.317 |
| Hypoxanthine                                           | 0.521       | Down  | 0.006  | 3.198 |
| (13E)-11a-Hydroxy-9,15-dioxoprost-13-enoic acid        | 0.425       | Down  | 0.000  | 3.014 |
| 6-Keto-prostaglandin F1a                               | 0.426       | Down  | 0.000  | 2.920 |
| Merodesmosine                                          | 3.482       | Up    | 0.004  | 2.871 |
| 3,4-Dihydroxymandelic acid                             | 0.343       | Down  | 0.002  | 2.779 |
| L-Arginine                                             | 0.560       | Down  | 0.001  | 2.475 |
| Thiomorpholine 3-carboxylate                           | 1.961       | Up    | 0.019  | 2.464 |
| 15-Keto-prostaglandin F2a                              | 0.496       | Down  | 0.001  | 2.463 |
| Sphinganine 1-phosphate                                | 1.685       | Up    | 0.000  | 2.299 |
| 20-Hydroxyeicosatetraenoic acid                        | 1.809       | Up    | 0.001  | 2.250 |
| Spermidine                                             | 0.523       | Down  | 0.016  | 2.172 |
| But-2-enoic acid                                       | 1.741       | Up    | 0.022  | 1.819 |
| PE(P-18:0/22:4(7Z,10Z,13Z,16Z))                        | 0.611       | Down  | 0.036  | 1.805 |
| Glycerol                                               | 1.569       | Up    | 0.030  | 1.717 |
| 4-Oxoproline                                           | 1.294       | Up    | 0.000  | 1.629 |
| Pyroglutamic acid                                      | 1.297       | Up    | 0.000  | 1.610 |
| Iodine                                                 | 0.742       | Down  | 0.012  | 1.530 |
| PE-NMe2(18:1(9Z)/18:1(9Z))                             | 0.688       | Down  | 0.039  | 1.504 |
| Indolepyruvate                                         | 0.621       | Down  | 0.019  | 1.369 |
| 4,4'-Diapolycopenedial                                 | 0.673       | Down  | 0.004  | 1.345 |
| N-Acetyl-L-methionine                                  | 0.720       | Down  | 0.028  | 1.341 |
| Sphinganine                                            | 1.522       | Up    | 0.002  | 1.339 |
| PS(18:0/18:1(9Z))                                      | 2.234       | Up    | 0.047  | 1.326 |
| Alpha-Linolenoyl ethanolamide                          | 1.344       | Up    | 0.014  | 1.302 |
| Sphingosine                                            | 1.520       | Up    | 0.039  | 1.218 |
| PE(P-16:0/18:1(9Z))                                    | 0.673       | Down  | 0.023  | 1.212 |
| Sphingosine 1-phosphate                                | 1.240       | Up    | 0.006  | 1.188 |
| LysoPE(18:0/0:0)                                       | 0.802       | Down  | 0.021  | 1.182 |
| N-Acetylneuraminate                                    | 0.560       | Down  | 0.028  | 1.164 |
| Allantoic acid                                         | 1.210       | Up    | 0.028  | 1.154 |
| Dihydrofolic acid                                      | 1.557       | Up    | 0.042  | 1.028 |

**Table S4.** Results of pathway analysis (IgCo colostrum milk pre- vs post-intervention) with MetPA system (MetaboAnalyst 5.0).

| Pathway name                                           | Hits | Raw p    | -log(p) | Holm adjust | FDR      | Impact |
|--------------------------------------------------------|------|----------|---------|-------------|----------|--------|
| Ubiquinone and other terpenoid-quinone biosynthesis    | 1    | 0.2543   | 0.5947  | 1.0000      | 0.2702   | 1.0000 |
| Glycerophospholipid metabolism                         | 3    | 0.0004   | 3.3491  | 0.0063      | 0.0019   | 0.1996 |
| Cysteine and methionine metabolism                     | 1    | 0.0150   | 1.8232  | 0.1202      | 0.0255   | 0.1045 |
| Tyrosine metabolism                                    | 2    | 0.0007   | 3.1420  | 0.0094      | 0.0024   | 0.0895 |
| Arginine biosynthesis                                  | 1    | 0.2234   | 0.6509  | 1.0000      | 0.2702   | 0.0761 |
| Sphingolipid metabolism                                | 3    | 0.0001   | 3.8313  | 0.0024      | 0.0012   | 0.0690 |
| Arginine and proline metabolism                        | 1    | 0.2234   | 0.6509  | 1.0000      | 0.2702   | 0.0579 |
| N-Glycan biosynthesis                                  | 1    | 0.0063   | 2.1988  | 0.0633      | 0.0134   | 0.0573 |
| Tryptophan metabolism                                  | 1    | 2.65E-07 | 6.5762  | 4.51E-06    | 4.51E-06 | 0.0390 |
| Glycosylphosphatidylinositol (GPI)-anchor biosynthesis | 1    | 0.3222   | 0.4919  | 1.000       | 0.3222   | 0.0040 |
| Biosynthesis of unsaturated fatty acids                | 1    | 0.0002   | 3.6728  | 0.0032      | 0.0012   | 0.0000 |
| Ether lipid metabolism                                 | 1    | 0.0009   | 3.0653  | 0.01039     | 0.0024   | 0.0000 |
| Arachidonic acid metabolism                            | 1    | 0.0011   | 2.9531  | 0.0123      | 0.0027   | 0.0000 |
| Aminoacyl-tRNA biosynthesis                            | 2    | 0.0129   | 1.8886  | 0.1163      | 0.0244   | 0.0000 |
| Phenylalanine metabolism                               | 1    | 0.1328   | 0.8767  | 0.9298      | 0.2053   | 0.0000 |
| Steroid hormone biosynthesis                           | 1    | 0.1893   | 0.7229  | 1.0000      | 0.2682   | 0.0000 |
| Phenylalanine, tyrosine and tryptophan biosynthesis    | 1    | 0.2543   | 0.5947  | 1.0000      | 0.2702   | 0.0000 |

**Table S5.** Results of pathway analysis (Placebo pre- vs post-intervention) with MetPA system (MetaboAnalyst 5.0).

| Pathway name                                   | Hits | Raw p    | -log(p) | Holm<br>adjust | FDR    | Impact |
|------------------------------------------------|------|----------|---------|----------------|--------|--------|
| Sphingolipid metabolism                        | 4    | 3.89E-05 | 4.4098  | 0.0006         | 0.0003 | 0.2475 |
| Glycerolipid metabolism                        | 1    | 0.0111   | 1.9552  | 0.0776         | 0.0161 | 0.2368 |
| Arginine and proline metabolism                | 2    | 0.0057   | 2.2465  | 0.0567         | 0.0110 | 0.0919 |
| Arginine biosynthesis                          | 1    | 0.0062   | 2.2097  | 0.0567         | 0.0110 | 0.0761 |
| Glycerophospholipid metabolism                 | 1    | 0.0192   | 1.7177  | 0.0835         | 0.0219 | 0.0470 |
| Tryptophan metabolism                          | 2    | 4.87E-05 | 4.3121  | 0.0007         | 0.0003 | 0.0390 |
| Amino sugar and nucleotide sugar<br>metabolism | 1    | 0.0757   | 1.1207  | 0.0835         | 0.0757 | 0.0219 |
| Purine metabolism                              | 2    | 0.0015   | 2.8383  | 0.0174         | 0.0046 | 0.0167 |
| One carbon pool by folate                      | 1    | 0.0168   | 1.7771  | 0.0835         | 0.0206 | 0.0159 |
| Glutathione metabolism                         | 2    | 0.0006   | 3.2390  | 0.0075         | 0.0023 | 0.0143 |
| Tyrosine metabolism                            | 1    | 0.0021   | 2.6770  | 0.0231         | 0.0056 | 0.0067 |
| Folate biosynthesis                            | 1    | 0.0167   | 1.7771  | 0.0835         | 0.0206 | 0.0043 |
| Arachidonic acid metabolism                    | 1    | 2.93E-05 | 4.5330  | 0.0005         | 0.0003 | 0.0000 |
| Aminoacyl-tRNA biosynthesis                    | 1    | 0.0062   | 2.2097  | 0.0567         | 0.0110 | 0.0000 |
| Galactose metabolism                           | 1    | 0.0111   | 1.9552  | 0.0776         | 0.0161 | 0.0000 |
| beta-Alanine metabolism                        | 1    | 0.0339   | 1.4703  | 0.08359        | 0.0361 | 0.0000 |

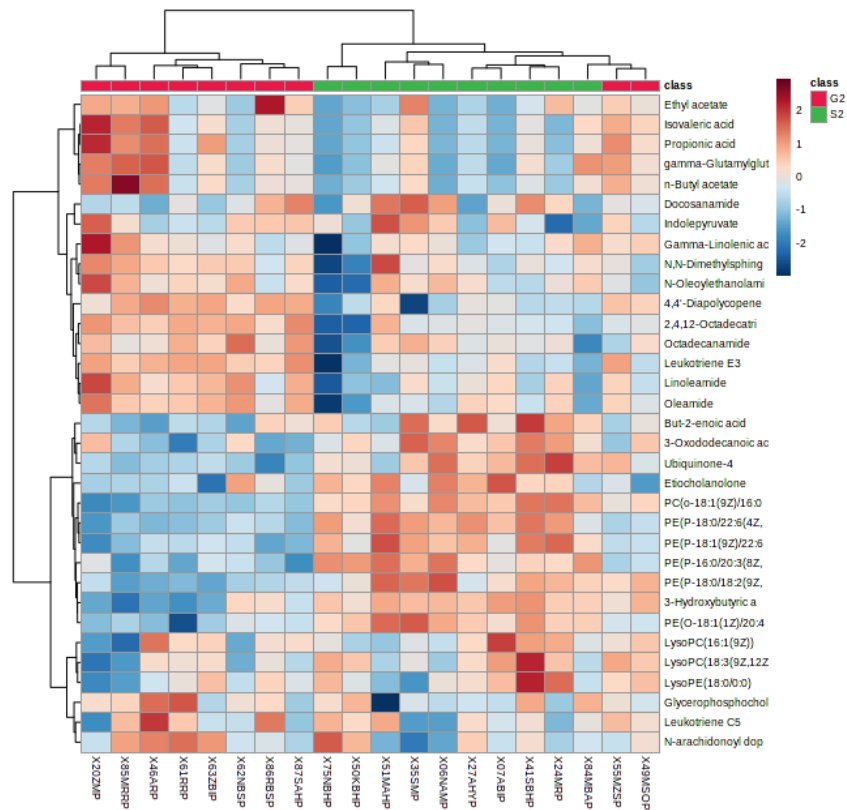

**Figure S1.** Heat map of the identified plasma metabolites of individuals in IgCo supplemented group and placebo group after 12 weeks of intervention.
